# Supplementary material
Source: publisher figshare collection journal article supplement (https://geolsoc.figshare.com/ndownloader/files/25671929)
Supplement: Supplementary file 1 [file 25671929]

## Sheet: isotopes
Sample ID	Data source	Location	{87}Sr/{86}Sr	{143}Nd/{144}Nd	Nd	{206}Pb/{204}Pb	{207}Pb/{204}Pb	{208}Pb/{204}Pb	{176}Hf/{177}Hf	eHf
BP-4	Mei et al., 2018	Hainan	0.704028	0.512879	4.8573	18.6118	15.6111	38.8191	0.283026	8.52238
YX-3	Mei et al., 2018	Hainan	0.704053	0.512872	4.72075	18.6532	15.6155	38.9045	0.283016	8.16875
GR-3	Mei et al., 2018	Hainan	0.703134	0.512949	6.22281	18.4047	15.4545	38.3629	0.283012	8.0273
ZW-2	Mei et al., 2018	Hainan	0.70317	0.512949	6.22281	18.3863	15.4573	38.3418	0.283018	8.23948
BP-2	Mei et al., 2018	Hainan	0.704057	0.512884	4.95484	18.6106	15.6131	38.8199	0.28302	8.3102
YX-1	Mei et al., 2018	Hainan	0.704037	0.512867	4.62322	18.6511	15.6176	38.9051	0.283017	8.20411
YX-4	Mei et al., 2018	Hainan	0.704033	0.512884	4.95484	18.6195	15.6167	38.8724	0.283024	8.45165
DWL-2	Mei et al., 2018	Hainan	0.703381	0.512963	6.49591	18.6002	15.5486	38.7088	0.283075	10.2551
BP-1	Mei et al., 2018	Hainan	0.704069	0.512883	4.93533	18.6124	15.6141	38.8258	0.283029	8.62846
BP-5	Mei et al., 2018	Hainan	0.70406	0.512879	4.8573	18.5543	15.6117	38.7647	0.28303	8.66383
ZT-1	Mei et al., 2018	Hainan	0.704138	0.512789	3.10165	18.6766	15.6295	38.9761	0.28295	5.83482
ZT-2	Mei et al., 2018	Hainan	0.704128	0.512791	3.14067	18.6306	15.6284	38.9325	0.282946	5.69337
FL-1	Mei et al., 2018	Hainan	0.703877	0.512886	4.99386	18.6457	15.6097	38.8672	0.283022	8.38093
NL-3	Mei et al., 2018	Hainan	0.704314	0.512814	3.58933	18.5483	15.5833	38.7534	0.282975	6.71889
CM-1	Mei et al., 2018	Hainan	0.704216	0.512832	3.94046	18.6448	15.6019	38.8811	0.282983	7.00179
DF1-1	Mei et al., 2018	Hainan	0.704091	0.51286	4.48667	18.6427	15.6144	38.8912	0.283026	8.52238
SSGY-2	Mei et al., 2018	Hainan	0.703906	0.512878	4.8378	18.6203	15.6119	38.8488	0.283026	8.52238
LH-3	Mei et al., 2018	Hainan	0.70421	0.512838	4.05751	18.6659	15.607	38.8022	0.282996	7.4615
LH-4	Mei et al., 2018	Hainan	0.704201	0.512834	3.97948	18.6761	15.6079	38.8073	0.283001	7.63831
PL-1	Mei et al., 2018	Hainan	0.704297	0.51284	4.09652	18.6658	15.573	38.7906	0.282993	7.35541
PL-10	Mei et al., 2018	Hainan	0.703875	0.512866	4.60371	18.5876	15.5388	38.6987	0.282993	7.35541
JZ-1	Mei et al., 2018	Hainan	0.704059	0.512837	4.038	18.7668	15.5949	38.864	0.28296	6.18845
JZ-2	Mei et al., 2018	Hainan	0.704076	0.512844	4.17455	18.7651	15.5982	38.8696	0.282966	6.40062
BB-1	Mei et al., 2018	Hainan	0.703178	0.512941	6.06675	18.3518	15.4754	38.3527	0.28304	9.01745
BL-2	Mei et al., 2018	Hainan	0.703428	0.5129	5.26696	18.6848	15.573	38.7846	0.282968	6.47135
HQ-1	Mei et al., 2018	Hainan	0.703879	0.512838	4.05751	18.7457	15.619	38.958	0.28294	5.4812
DW-2	Mei et al., 2018	Hainan	0.703602	0.512869	4.66223	18.8136	15.5583	38.793	0.28297	6.54207
YL-1	Mei et al., 2018	Hainan	0.704147	0.512804	3.39426	18.7526	15.6301	38.9931	0.282939	5.44583
YN-1	Mei et al., 2018	Hainan	0.703505	0.512885	4.97435	18.6848	15.5794	38.7995	0.282971	6.57744
YN-1	Mei et al., 2018	Hainan	0.703505	0.512882	4.91583	18.6848	15.5794	38.7995	0.282971	6.57744
DWL-1	Mei et al., 2018	Hainan	0.703188	0.512929	5.83267	18.7993	15.5633	38.7869	0.282983	7.00179
NL-2	Mei et al., 2018	Hainan	0.704418	0.512827	3.84293	18.6149	15.5969	38.8087	0.282993	7.35541
LQ-1	Mei et al., 2018	Hainan	0.704179	0.51278	2.92609	18.6853	15.6402	38.9531	0.282944	5.62265
DF2-3	Mei et al., 2018	Hainan	0.704292	0.512837	4.038	18.7593	15.6231	38.9281	0.283014	8.09803
DF3-3	Mei et al., 2018	Hainan	0.704289	0.512846	4.21357	18.7629	15.6244	38.9359	0.283023	8.41629
NX-1	Mei et al., 2018	Hainan	0.70318	0.512937	5.98872	18.3452	15.4753	38.3446	0.283043	9.12354
MX-2	Mei et al., 2018	Hainan	0.703469	0.51289	5.07188	18.6848	15.577	38.792	0.282967	6.43598
MX-3	Mei et al., 2018	Hainan	0.703534	0.512884	4.95484	18.6839	15.5737	38.7857	0.282978	6.82497
MT-1	Mei et al., 2018	Hainan	0.703143	0.512922	5.69612	18.3816	15.4914	38.4201	0.283027	8.55774
SMP-4	Mei et al., 2018	Hainan	0.703855	0.512879	4.8573	18.7625	15.589	38.8481	0.282982	6.96642
H-10	Tu et al., 1991	Hainan	0.70422	0.512876	4.79878	18.726	15.603	38.84
H-19	Tu et al., 1991	Hainan	0.704474	0.512859	4.46716	18.622	15.597	38.82
H-91	Tu et al., 1991	Hainan	0.704308	0.512881	4.89632	18.738	15.611	38.9
H-40	Tu et al., 1991	Hainan	0.704028	0.512907	5.40351	18.682	15.619	38.91
H-40-2	Tu et al., 1991	Hainan				18.67	15.604	38.87
H-90	Tu et al., 1991	Hainan	0.704149	0.512908	5.42301	18.679	15.568	38.78
H-36	Tu et al., 1991	Hainan	0.704032	0.512871	4.70125	18.667	15.601	38.85
H-41	Tu et al., 1991	Hainan	0.703985	0.512819	3.68687	18.72	15.649	38.98
H-41-2	Tu et al., 1991	Hainan				18.734	15.665	39.07
H-95	Tu et al., 1991	Hainan	0.704178	0.512866	4.60371	18.667	15.619	38.99
H-83	Tu et al., 1991	Hainan	0.703893	0.512925	5.75464	18.593	15.542	38.69
H-22	Tu et al., 1991	Hainan	0.703824	0.512866	4.60371	18.464	15.614	38.88
H-55	Tu et al., 1991	Hainan	0.70419	0.512868	4.64272	18.674	15.612	38.98
H-77	Tu et al., 1991	Hainan	0.703814	0.512926	5.77415	18.66	15.613	38.88
H-76	Tu et al., 1991	Hainan	0.703833	0.51293	5.85217	18.636	15.581	38.79
H-62	Tu et al., 1991	Hainan	0.704019	0.512912	5.50104
H-27	Tu et al., 1991	Hainan	0.70417	0.512874	4.75977	18.661	15.61	38.87
H-33	Tu et al., 1991	Hainan	0.704017	0.512885	4.97435	18.646	15.607	38.89
H-97	Tu et al., 1991	Hainan	0.703537	0.512876	4.79878	18.645	15.536	38.71
H-98	Tu et al., 1991	Hainan	0.703544	0.512897	5.20843	18.621	15.519	38.67
H-99	Tu et al., 1991	Hainan	0.703571	0.512881	4.89632	18.615	15.505	38.64
H-1	Tu et al., 1991	Hainan	0.702833	0.512891	5.09139	18.61	15.52	38.67
08HN-1A	Wang et al., 2013	Hainan	0.70352	0.512877	4.81829	18.61	15.5	38.59
08HN-2A	Wang et al., 2013	Hainan	0.70347	0.512896	5.18893	18.62	15.51	38.63
08HN-2B	Wang et al., 2013	Hainan	0.70352	0.512895	5.16942	18.59	15.52	38.62
08HN-3	Wang et al., 2013	Hainan	0.70351	0.512909	5.44252	18.63	15.55	38.73
08HN-4B	Wang et al., 2013	Hainan	0.70417	0.512875	4.77928	18.66	15.57	38.8
08HN-4D	Wang et al., 2013	Hainan	0.70422	0.512844	4.17455	18.57	15.58	38.76
08HN-5C	Wang et al., 2013	Hainan	0.70439	0.512814	3.58933	18.55	15.56	38.72
08HN-5E	Wang et al., 2013	Hainan	0.70448	0.512816	3.62835	18.6	15.59	38.79
08HN-5F	Wang et al., 2013	Hainan	0.70447	0.512821	3.72588	18.56	15.57	38.76
08HN-5J	Wang et al., 2013	Hainan	0.70433	0.512825	3.80391	18.55	15.56	38.67
08HN-8A	Wang et al., 2013	Hainan	0.7035	0.512933	5.9107	18.75	15.63	38.96
08HN-10B	Wang et al., 2013	Hainan	0.70431	0.512839	4.07701	18.77	15.63	38.97
08HN-11A	Wang et al., 2013	Hainan	0.70432	0.512845	4.19406	18.39	15.45	38.35
08HN-14A	Wang et al., 2013	Hainan	0.7031	0.512928	5.81316	18.4	15.48	38.45
08HN-16A	Wang et al., 2013	Hainan	0.70316	0.51294	6.04725	18.4	15.47	38.36
08HN-16C	Wang et al., 2013	Hainan	0.70314	0.512931	5.87168	18.58	15.58	38.76
08HN-18B	Wang et al., 2013	Hainan	0.70362	0.512885	4.97435	18.62	15.55	38.73
08HN-19A	Wang et al., 2013	Hainan	0.70338	0.512968	6.59345	18.62	15.55	38.74
08HN-19C	Wang et al., 2013	Hainan	0.7034	0.512968	6.59345	18.65	15.61	38.85
08HN-22D	Wang et al., 2013	Hainan	0.70417	0.512854	4.36962	18.64	15.63	38.89
08HN-24B	Wang et al., 2013	Hainan	0.70413	0.512863	4.54519	18.65	15.62	38.95
08HN-25A	Wang et al., 2013	Hainan	0.70426	0.512816	3.62835	18.67	15.65	39.05
08HN-25C	Wang et al., 2013	Hainan	0.70421	0.512837	4.038	18.59	15.51	38.7
ZK03-29-1	Wang et al., 2013	Hainan	0.70367	0.512863	4.54519	18.62	15.58	38.72
ZK04-10-5	Wang et al., 2013	Hainan		0.512839	4.07701	18.61	15.6	38.82
ZK05-21.1	Wang et al., 2013	Hainan		0.512827	3.84293	18.58	15.59	38.8
ZK05-25-4	Wang et al., 2013	Hainan		0.512837	4.038
HXSF	Han et al., 2008	Hainan	0.70391	0.512875	4.77928	18.58	15.54	38.61
HHLA-26	Han et al., 2008	Hainan	0.7042	0.512819	3.68687	18.73	15.58	38.82
HQBA-10	Han et al., 2008	Hainan	0.70414	0.512783	2.98461	18.53	15.53	38.59
HWNA	Han et al., 2008	Hainan	0.70448	0.512768	2.692	18.52	15.52	38.52
HXYA-1A	Han et al., 2008	Hainan	0.704	0.51285	4.29159	18.62	15.58	38.72
HWGA-3	Han et al., 2008	Hainan	0.70357	0.512878	4.8378	18.5	15.41	38.33
HXYB-5	Han et al., 2008	Hainan	0.70396	0.512838	4.05751	18.59	15.56	38.72
HWPB0	Han et al., 2008	Hainan	0.70347	0.512872	4.72075	18.54	15.45	38.44
HHJA-15	Han et al., 2008	Hainan	0.70386	0.512865	4.5842	18.72	15.55	38.62
HLMA1-4	Han et al., 2008	Hainan	0.70337	0.512848	4.25258	18.76	15.6	38.71
HWPA-12	Han et al., 2008	Hainan	0.70357	0.512884	4.95484	18.58	15.48	38.42
HN9901	Zou and Fan, 2010	Hainan	0.70385	0.512868	4.64272	18.63	15.61	38.85
HN9902	Zou and Fan, 2010	Hainan	0.70392	0.512884	4.95484
HN9907	Zou and Fan, 2010	Hainan	0.70418	0.512848	4.25258	18.66	15.63	38.87
HN9908	Zou and Fan, 2010	Hainan	0.70423	0.512869	4.66223	18.69	15.65	38.88
HN9910	Zou and Fan, 2010	Hainan	0.70427	0.512861	4.50617	18.7	15.63	38.87
HN9912	Zou and Fan, 2010	Hainan	0.70418	0.512862	4.52568	18.71	15.62	38.85
H1	Zhu and Wang, 1989	Hainan	0.703722	0.512892	5.1109	18.488	15.638	38.518
H3	Zhu and Wang, 1989	Hainan	0.703419	0.512909	5.44252	18.452	15.556	38.752
H6	Zhu and Wang, 1989	Hainan	0.703993	0.512851	4.3111	18.445	15.466	38.69
H7	Zhu and Wang, 1989	Hainan	0.703763	0.512852	4.33061
H13	Zhu and Wang, 1989	Hainan	0.703471	0.513039	7.97846
H16	Zhu and Wang, 1989	Hainan	0.70378	0.512957	6.37887
H18	Zhu and Wang, 1989	Hainan	0.70412	0.512797	3.25771	18.619	15.596	39.051
H25	Zhu and Wang, 1989	Hainan	0.703645	0.512916	5.57907
H24	Zhu and Wang, 1989	Hainan	0.703775	0.512972	6.67148
H22	Zhu and Wang, 1989	Hainan	0.704352	0.512934	5.9302
HJ11-01	Sun et al., 2019	Leizhou	0.704775	0.512769	2.71151	18.727	15.666	39.077	0.282964	6.3299
HJ11-03	Sun et al., 2019	Leizhou	0.703882	0.51289	5.07188	18.642	15.627	38.877	0.283039	8.98209
HJ11-06	Sun et al., 2019	Leizhou	0.704551	0.512794	3.19919	18.595	15.639	38.934	0.282996	7.4615
HJ11-07	Sun et al., 2019	Leizhou	0.704888	0.512755	2.43841	18.666	15.657	39.019	0.282952	5.90555
HJ11-09	Sun et al., 2019	Leizhou	0.703954	0.512883	4.93533	18.605	15.626	38.876	0.283027	8.55774
HJ11-11	Sun et al., 2019	Leizhou	0.704871	0.512754	2.4189	18.713	15.664	39.058	0.282939	5.44583
HJ11-12	Sun et al., 2019	Leizhou	0.704783	0.512779	2.90658	18.702	15.659	39.031	0.282944	5.62265
HJ11-13	Sun et al., 2019	Leizhou	0.704749	0.512787	3.06264	18.564	15.635	38.894	0.282943	5.58728
HJ11-14	Sun et al., 2019	Leizhou	0.704179	0.512849	4.27209	18.547	15.619	38.842	0.283016	8.16875
HJ11-15	Sun et al., 2019	Leizhou	0.704088	0.512871	4.70125	18.611	15.623	38.874	0.283011	7.99194
TY11-01	Sun et al., 2019	Leizhou	0.703267	0.512972	6.67148	18.516	15.558	38.555	0.283096	10.9978
JJ11-01	Sun et al., 2019	Leizhou	0.703295	0.512977	6.76901	18.454	15.53	38.425	0.2831	11.1392
ZC11-01	Sun et al., 2019	Leizhou	0.703557	0.512943	6.10577	18.6	15.582	38.661	0.283045	9.19426
ZC11-02	Sun et al., 2019	Leizhou	0.702955	0.512998	7.17867	18.485	15.545	38.469	0.283124	11.9879
ZC11-03	Sun et al., 2019	Leizhou	0.703088	0.512995	7.12015	18.456	15.533	38.438	0.283098	11.0685
K2	Zhu and Wang, 1989	Leizhou	0.703581	0.512932	5.89119	18.474	15.479	38.488
K4	Zhu and Wang, 1989	Leizhou	0.703708	0.512747	2.28235	18.573	15.605	38.599
K7	Zhu and Wang, 1989	Leizhou	0.703101	0.513038	7.95896	18.141	15.461	38.099
K9	Zhu and Wang, 1989	Leizhou	0.703496	0.512985	6.92507
K10	Zhu and Wang, 1989	Leizhou	0.703432	0.512953	6.30084
K11	Zhu and Wang, 1989	Leizhou	0.703418	0.512943	6.10577	18.493	15.493	38.776
K12	Zhu and Wang, 1989	Leizhou	0.703642	0.512886	4.99386	18.529	15.523	38.503
K15	Zhu and Wang, 1989	Leizhou	0.703571	0.512736	2.06777	18.357	15.522	38.451
K18	Zhu and Wang, 1989	Leizhou	0.704624	0.512949	6.22281
K21	Zhu and Wang, 1989	Leizhou	0.703262	0.512813	3.56983	18.46	15.564	38.426
K31	Zhu and Wang, 1989	Leizhou	0.703253	0.513021	7.62733	18.48	15.469	38.289
SY13-5	Han et al., 2008	Leizhou	0.7032	0.512909	5.44252	18.36	15.43	38.13
JY5	Han et al., 2008	Leizhou	0.70363	0.512815	3.60884	18.64	15.6	38.71
Y12-10	Han et al., 2008	Leizhou	0.70326	0.51284	4.09652	18.57	15.54	38.53
CK280	Han et al., 2008	Leizhou	0.70368	0.512864	4.5647	18.48	15.49	38.38
SY9-7	Han et al., 2008	Leizhou	0.70318	0.512913	5.52055	18.41	15.47	38.23
R8	Han et al., 2008	Leizhou	0.70425	0.512791	3.14067	18.62	15.56	38.82
AN6	Han et al., 2008	Leizhou	0.70358	0.512844	4.17455	18.62	15.56	38.55
GD9-10	Han et al., 2008	Leizhou	0.70369	0.512893	5.13041	18.6	15.55	38.48
8-1	Han et al., 2008	Leizhou	0.70415	0.512839	4.07701	18.78	15.64	38.86
Reference:
Han, J., Xiong, X., Zhu, Z., 2009. Geochemistry of Late-Cenezoic basalts from Leiqiong area: The origin of EM2 and the contribution from sub-continental lithosphere mantle. Acta Petrologica Sinica, 25(12), 3208-3220 (in Chinese with English Abstract).
Mei, S., 2018. The petrogenesis and geodynamic mechanism of late Cenozoic basalts in north Hainan Island (Master dissertation). Guangzhou Institute of Geochemistry, Chinese Academy of Science, Guangzhou, China (in Chinese with English Abstrat).
Sun, P., Niu, Y., Guo, P., Chen, S., Duan, M., Gong, H., Wang, X., Xiao, Y., 2019. Multiple mantle metasomatism beneath the Leizhou Peninsula, South China: evidence from elemental and Sr-Nd-Pb-Hf isotope geochemistry of the late Cenozoic volcanic rocks. International Geology Review, 61, 1768-1785.
Tu, K., Flower, M.F., Carlson, R.W., Zhang, M., Xie, G., 1991. Sr, Nd, and Pb isotopic compositions of Hainan basalts (south China): implications for a subcontinental lithosphere Dupal source. Geology, 19, 567-569.
Wang, X.C., Li, Z.X., Li, X.H., Li, J., Xu, Y., Li, X., 2013. Identification of an ancient mantle reservoir and young recycled materials in the source region of a young mantle plume: Implications for potential linkages between plume and plate tectonics. Earth and Planetary Science Letters, 377, 248-259.
Zhu, B., Wang, H., 1989. Nd-Sr-Pb isotopic and chemical evidence for the volcanism with MORB-OIB source characteristics in the Leiqiong area, China. Geochimica, 3, 193-201 (in Chinese with English Abstract).
Zou, H., Fan, Q., 2010. U–Th isotopes in Hainan basalts: Implications for sub-asthenospheric origin of EM2 mantle endmember and the dynamics of melting beneath Hainan Island. Lithos, 116, 145-152.
